# Supplementary material for: Sustainable coke-resistant Ca-Al nano-sized catalyst for cogenerating of H2 and high value liquid fuels via pyrolysis catalytic steam reforming reaction of the polystyrene-phenol mixture
Source: Research Square preprint supplement (doi:10.21203/rs.3.rs-2329843/v1), 2022-12-14
Supplement: Supplementary file 1 [file cbdd5371428f8939878036cd.docx]

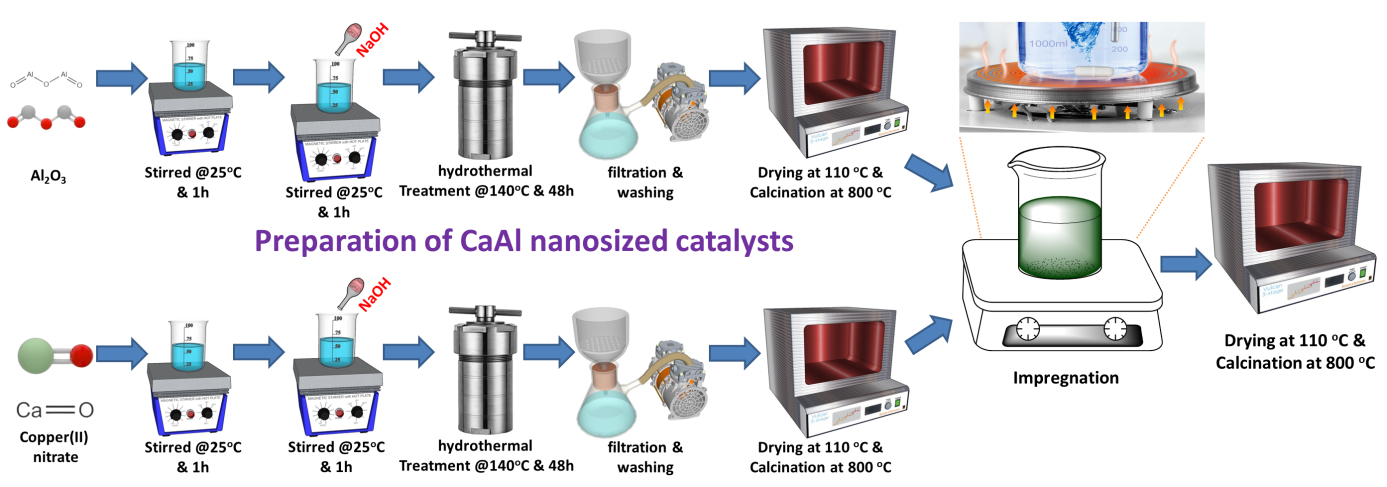


Figure S1: Synthesis procedure of Ca, 2Ca2Al, and 2Ca3Al nano-sized catalysts


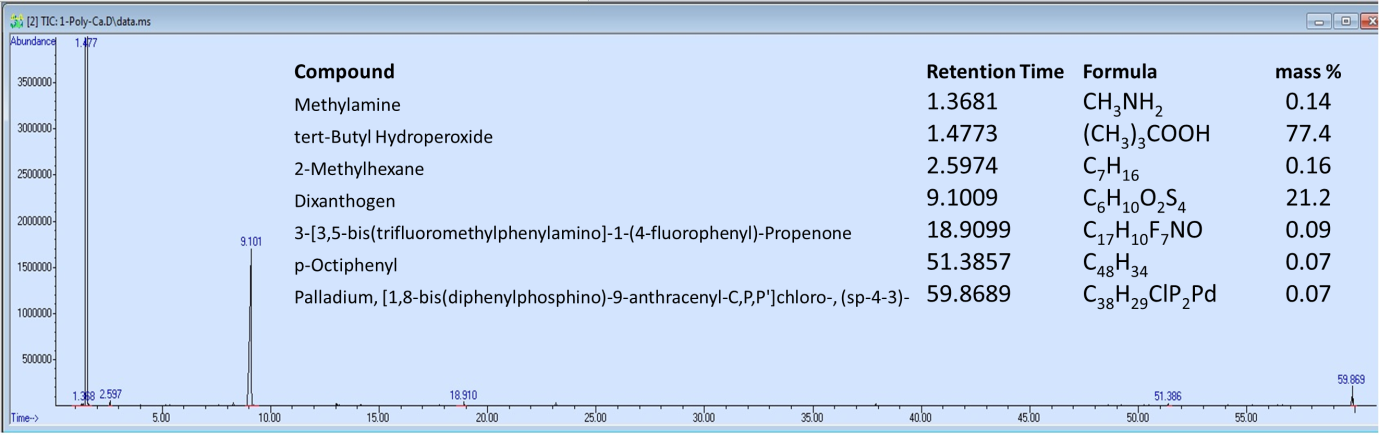


Figure S2: GCMS data of pyrolytic products
